# Supplementary material
Source: MDPI journal article supplement (https://www.mdpi.com/2073-4433/12/5/626)
Supplement: s1 [file s1]

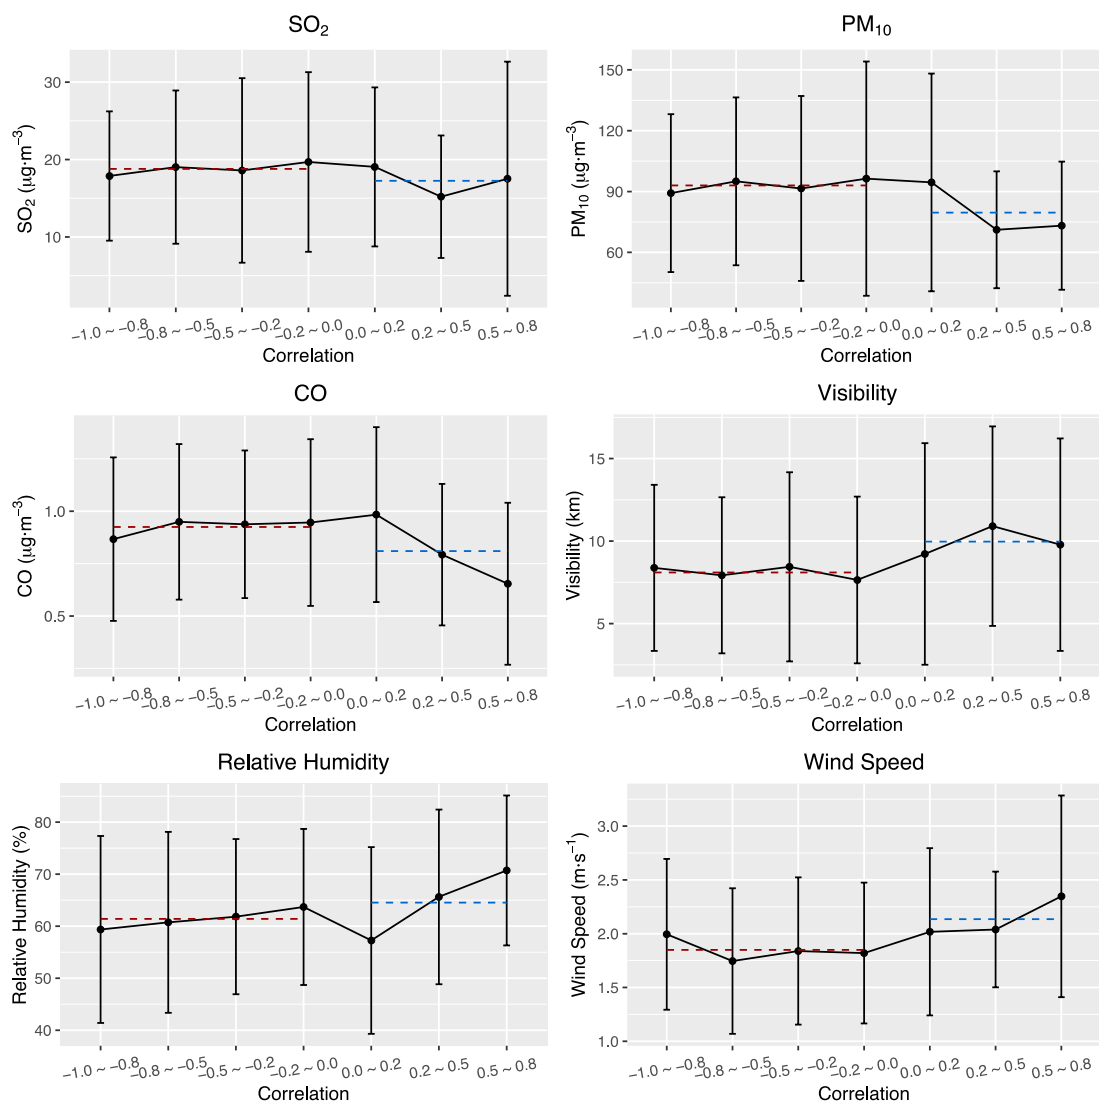

Fig. S1 Mass concentrations of pollutants (SO<sub>2</sub>, PM<sub>10</sub>, CO) and meteorological elements (Visibility, Relative Humidity, Wind Speed) under different levels of CBO
